# Supplementary material for: The Association between Noise, Cortisol and Heart Rate in a Small-Scale Gold Mining Community—A Pilot Study
Source: Int J Environ Res Public Health. 2015 Aug 21;12(8):9952–66. doi: 10.3390/ijerph120809952 (PMC4555322; doi:10.3390/ijerph120809952)
Supplement: Supplementary File 1 [file ijerph-12-09952-s001.pdf]

## The Association between Noise, Cortisol and Heart Rate in a Small-Scale Gold Mining Community—A Pilot Study

**Table S1.** Summary of the valid (*i.e.*, >0 dBA) L<sub>EQ</sub> noise measurement intervals over sampling period by subject and activity (N = 7775 monitored 3.75 minute intervals); 0 dBA intervals reassigned as 70 dBA.

| Leq                  | Valid Data % |      | Missing Data |
|----------------------|--------------|------|--------------|
|                      | Mean (%)     | SD % | % mean       |
| <b>Daily</b>         | 59.0         | 12.8 | 46.6         |
| <i>Activity</i>      |              |      |              |
| Leisure              | 72.4         | 24.7 | 27.6         |
| Work                 | 80.0         | 17.6 | 20.0         |
| Sleeping             | 16.0         | 14.1 | 84.0         |
| Non-mine work        | 75.9         | 26.5 | 24.1         |
| Mine work            | 79.2         | 17.2 | 20.8         |
| Grinding or crushing | 89.5         | 13.9 | 10.5         |
| Sifting or shanking  | 94.8         | 7.3  | 5.2          |
| Excavation           | 55.2         | 8.9  | 44.8         |
